# Supplementary material for: A fragment-based electrophile-first approach to target histidine with aryl-fluorosulfates: application to hMcl-1
Source: Research Square preprint supplement (doi:10.21203/rs.3.rs-6214862/v1), 2025-03-25
Supplement: Supplementary file 1 [file f355c4bd2635a3e016259984.pdf]

## **SUPPLEMENTARY INFORMATION FOR:**

### **A fragment-based electrophile-first approach to target histidine with aryl-fluorosulfates: application to hMcl-1**

Giulia Alboreggia<sup>1</sup>, Kendall Muzzarelli<sup>2</sup>, Zahra Assar<sup>2</sup>, and Maurizio Pellecchia<sup>1\*</sup>

<sup>1</sup> Division of Biomedical Sciences, School of Medicine, University of California Riverside, 900 University Avenue, Riverside, CA 92521, USA.

<sup>2</sup> Cayman Chemical Co., 1180 E. Ellsworth Road, Ann Arbor, MI 48108.

\* Correspondence: Maurizio.Pellecchia@ucr.edu; Tel.: 951- 827 7829

#### **Supplementary information contains:**

Supplementary Figures S1 – S9

Supplementary Tables S1 – S2

## SUPPLEMENTARY FIGURES

**Supplementary Figure S1:** Stability of fluorosulfates tested with 1D  $^1\text{H}$  NMR spectra collected at different time points (0 min, 1 h, 24 h, 48 h).

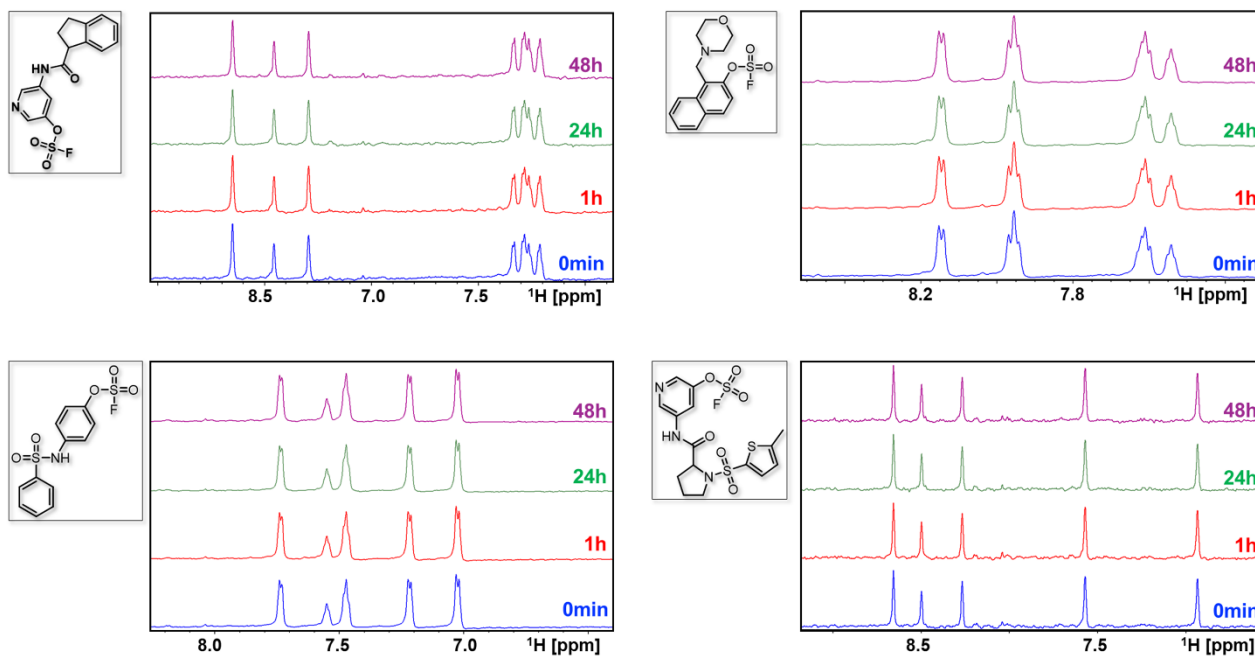

**Supplementary Figure S2:** Thermal denaturation curves for hMcl-1(172-323) or mutant proteins as indicated, collected in absence and presence of fragment hit 1 or fragment hit 2. **A)**  $\Delta T_m$  (*wt*-hMcl-1) =  $2.11 \pm 0.01$ ;  $\Delta T_m$  (hMcl-1 H224A) =  $-0.34 \pm 0.09$ ;  $\Delta T_m$  (hMcl-1 H252A) =  $2.90 \pm 0.17$ ;  $\Delta T_m$  (hMcl-1 K234A) =  $1.96 \pm 0.17$ . **B)**  $\Delta T_m$  (*wt*-hMcl-1) =  $3.97 \pm 0.17$ ;  $\Delta T_m$  (hMcl-1 H224A) =  $-1.28 \pm 0.17$ ;  $\Delta T_m$  (hMcl-1 H252A) =  $6.57 \pm 0.26$ ;  $\Delta T_m$  (hMcl-1 K234A) =  $4.77 \pm 0.26$ .

**A**

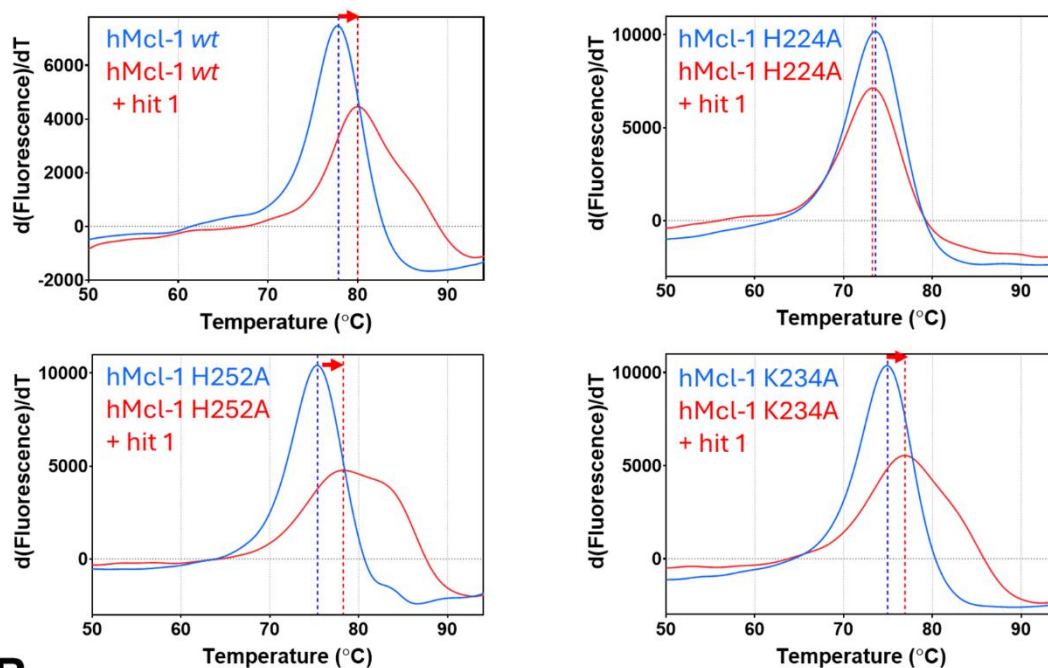

**B**

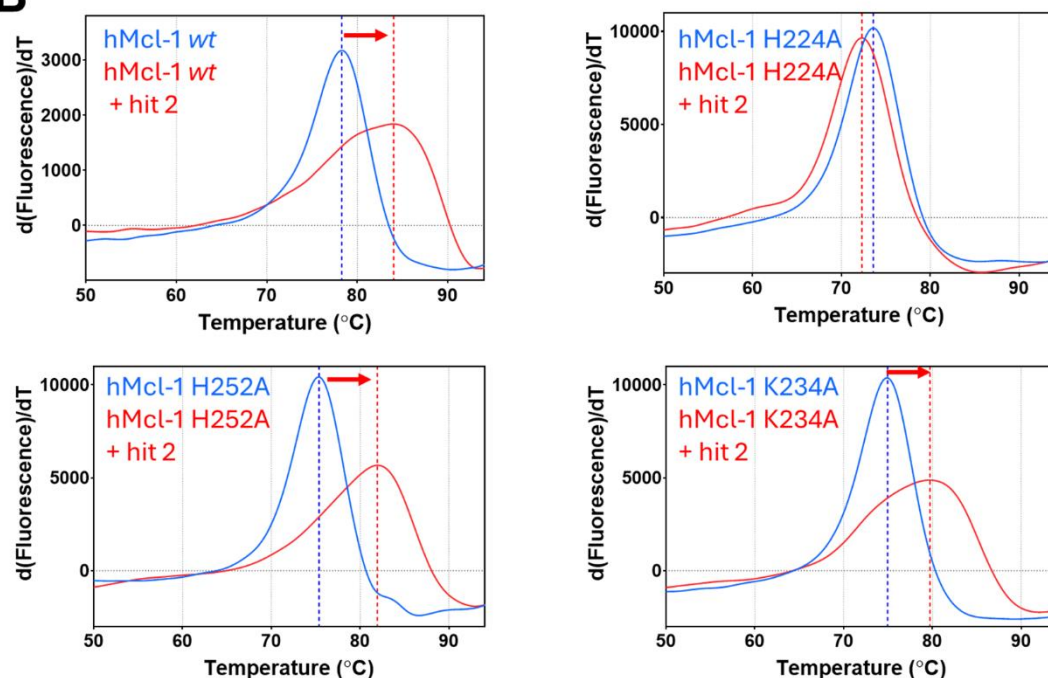

**Supplementary Figure S3:** Mass spectrometry analyses of hMcl-1(171-323) and mutants as indicated collected in presence of fragment hit 1 (A) or fragment hit 2 (B).

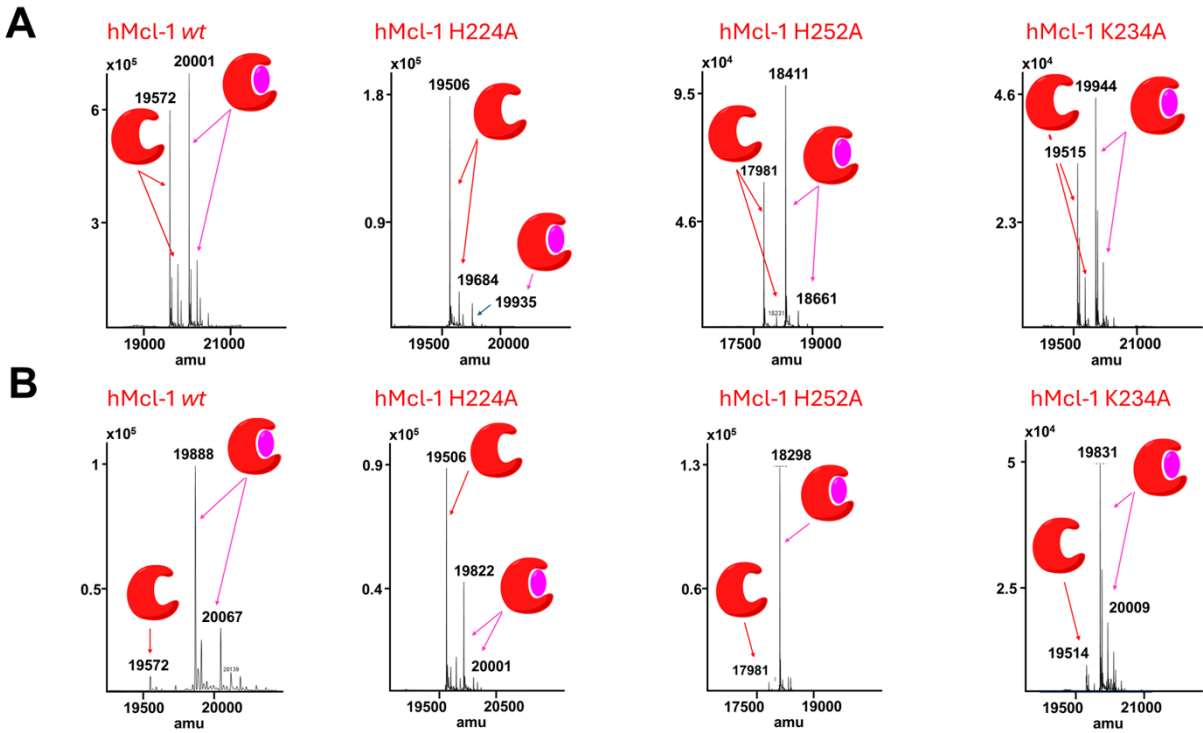

**Supplementary Figure S4:** Heteronuclear long range [ $^{15}\text{N}$ ,  $^1\text{H}$ ] NMR correlation spectra for His side chains detection. The spectra for hMcl-1(172-323) His252Ala, collected in absence (blue) or presence of fragment hit **2** after various incubation times (red, 1 h; yellow, 25 h) are superimposed. On the right, a zoomed region highlighting the chemical shift perturbations at His 224 is displayed.

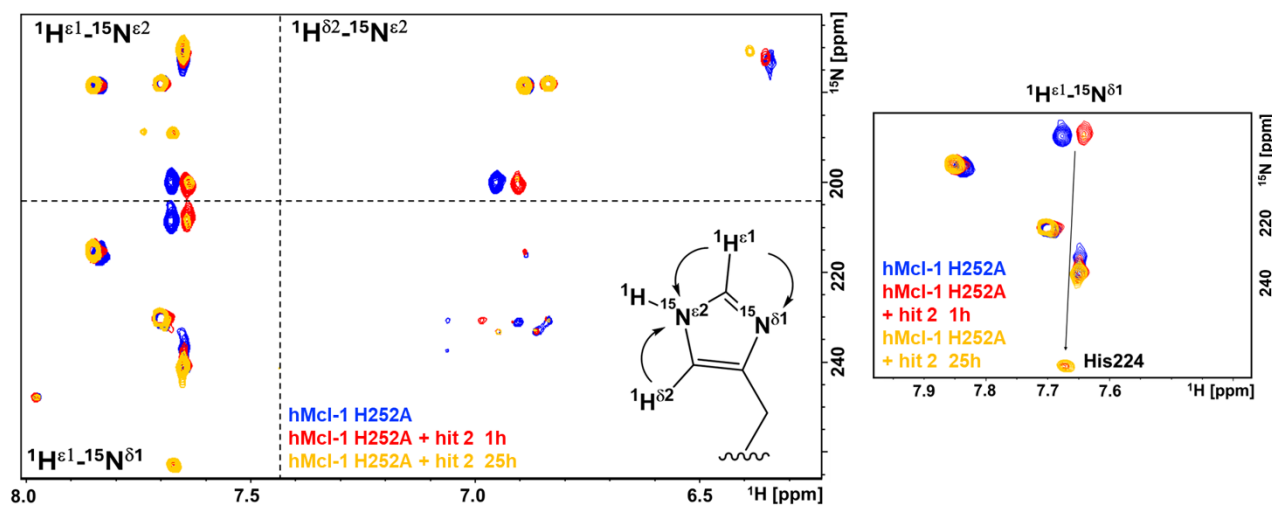

**Supplementary Figure S5:** Backbone 2D [ $^{15}\text{N}$ ,  $^1\text{H}$ ] correlation spectra for  $^{15}\text{N}$ -hMcl-1(172-323) (50  $\mu\text{M}$ ) collected in absence (blue) or presence of fragment hit **2** (1 mM) after various incubation times (red, 1 h; green, 25 h). Resonance assignments are also reported.

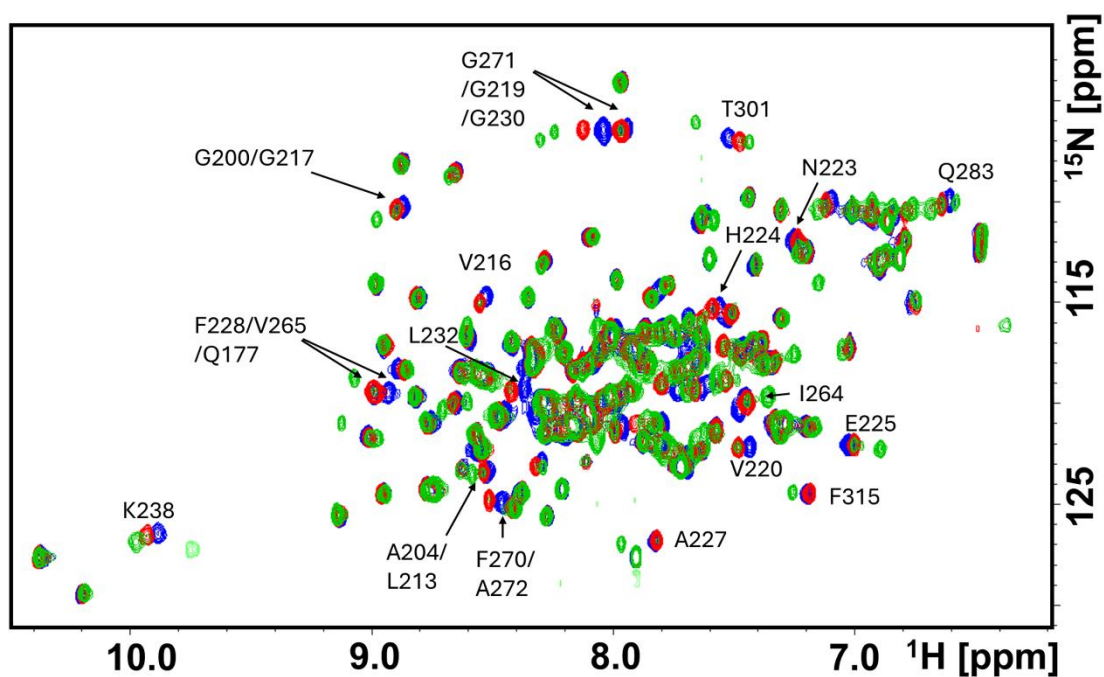

**Supplementary Figure S6:** Synthetic route used to obtain fragment hit **2** and its analogs reported in Figure 6. The purity of **165D9** by HPLC is also reported (purity > 98%).

**A**

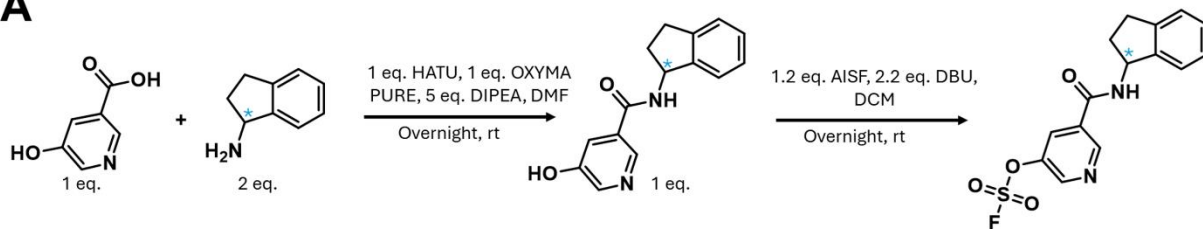

**B**

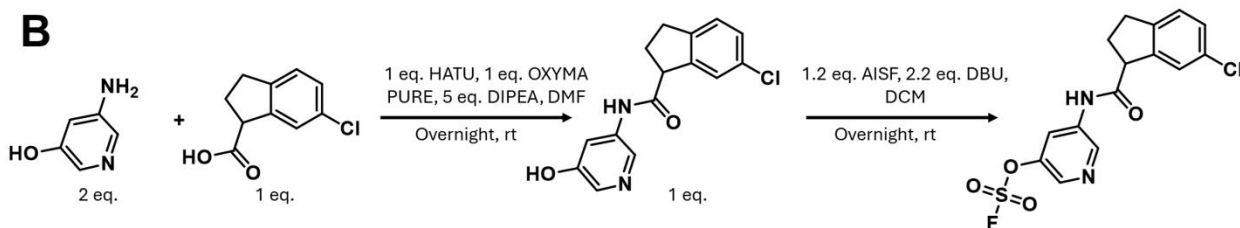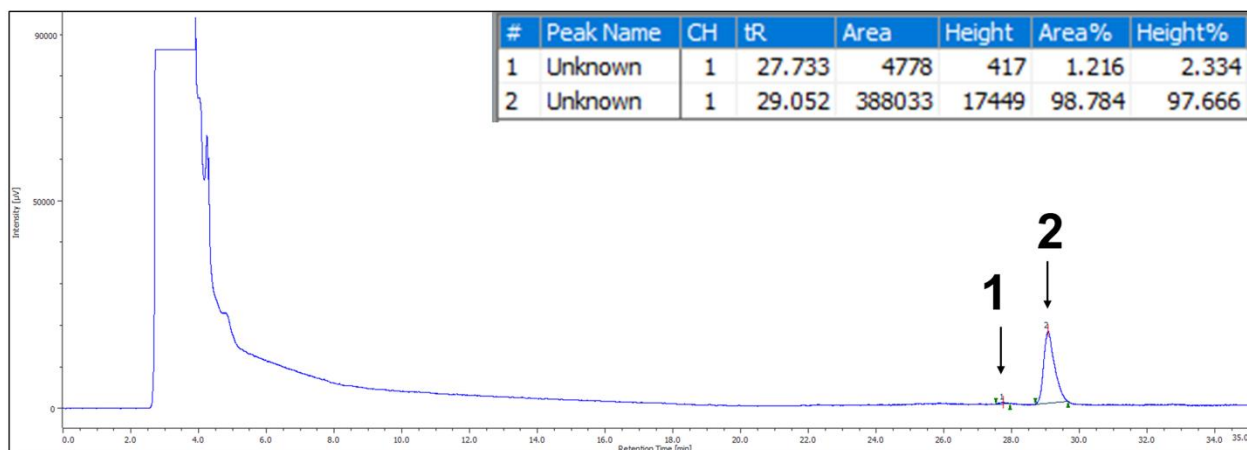

**Supplementary Figure S7:** Dose-response DELFIA inhibition curves with compound **165D9** after 24 h incubation ( $IC_{50} \sim 3.0 \mu M$ ; this experiment is an independent replicate of the data reported in **Figure 6D** that resulted in an  $IC_{50}$  value of  $\sim 2.5 \mu M$ ) or 4 h incubation ( $IC_{50} \sim 12 \mu M$ ).

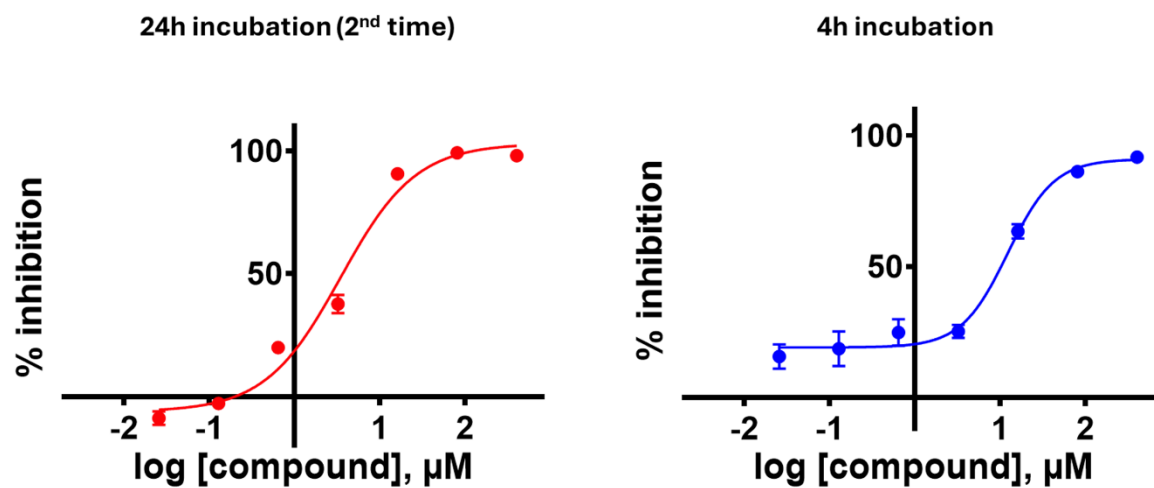



**Supplementary Figure S8: A)** Thermal denaturation curves for hMcl-1(172-323) or its mutants as indicated, collected in absence (blue) or presence of (250  $\mu$ M) **165D9**, after 8 h incubation.  $\Delta T_m$  (*wt*-hMcl-1) =  $10.23 \pm 0.05$ ;  $\Delta T_m$  (hMcl-1 H224A) =  $-1.15 \pm 0.04$ ;  $\Delta T_m$  (hMcl-1 H252A) =  $10.44 \pm 0.06$ ;  $\Delta T_m$  (hMcl-1 K234A) =  $9.96 \pm 0.20$ . **B)** Mass spectrometry analyses of hMcl-1(172-323) or mutants as indicated (each at 10  $\mu$ M), collected in presence of **165D9** (250  $\mu$ M) after 8 h incubation.

**A**

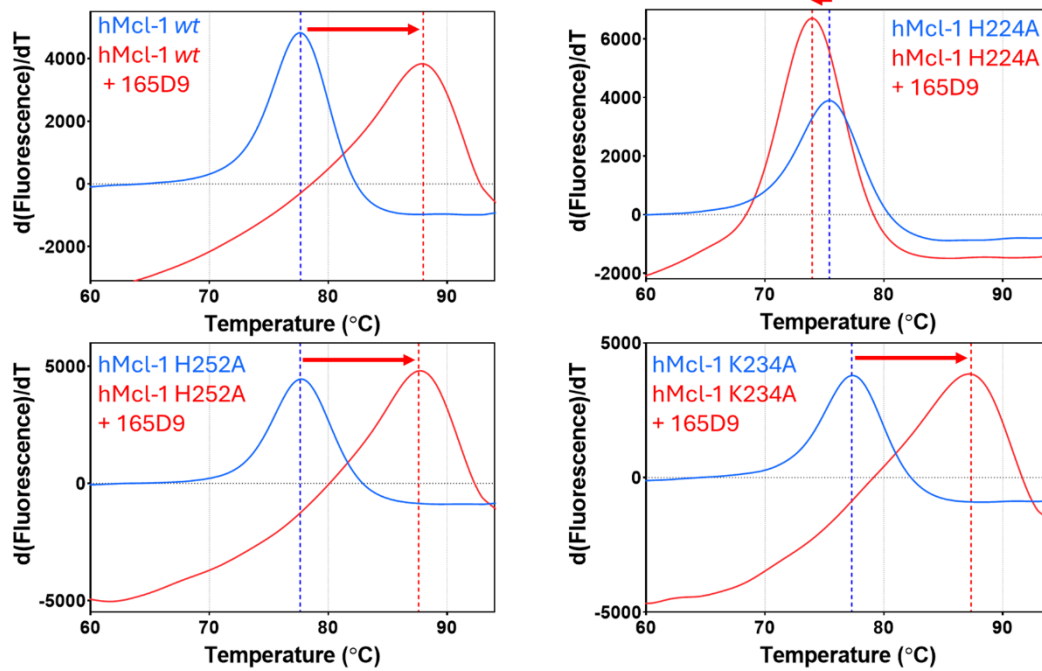

**B**

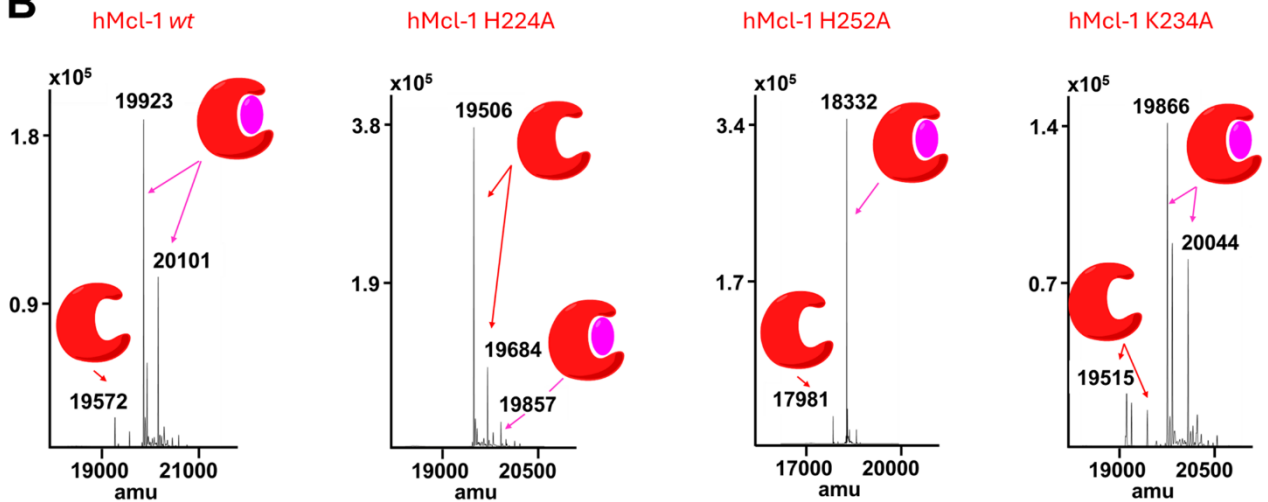

**Supplementary Figure S9: A)** 2D long-range [ $^{15}\text{N}$ ,  $^1\text{H}$ ] correlation spectra for His side chains of  $^{15}\text{N}$ -hMcl-1(172-323) (50  $\mu\text{M}$ ) collected at various pH values, as indicated. **B)** 2D long-range [ $^{15}\text{N}$ ,  $^1\text{H}$ ] correlation spectra for His side chains of hMcl-1(172-323) (50  $\mu\text{M}$ ) collected at pH= 6.5 in absence (blue) or presence of fragment hit **2** (1 mM) after various incubation times (red, 1 h; green, 42 h).

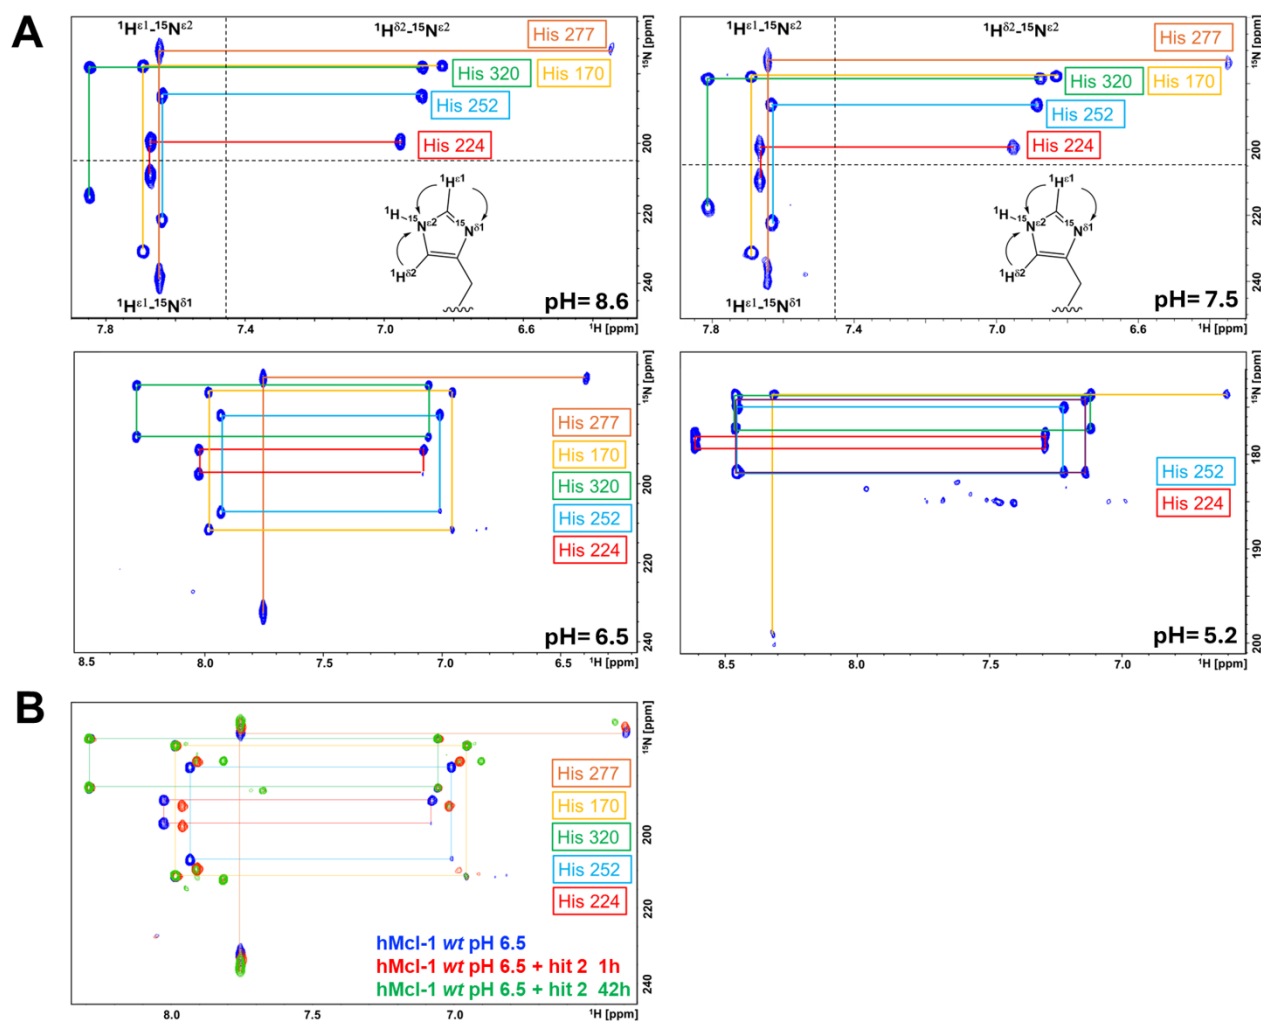

## SUPPLEMENTARY TABLES

**Supplementary Table S1:** Mass spectrometry data of hMcl-1(172-323) and its mutants collected in absence or presence of various agents as indicated. Molecular masses are measured and analyzed using an Agilent 6545 QTOF LC/MS mass spectrometer.

| ID                       | Calcd [M] | Obs. (m/z)                                                    |
|--------------------------|-----------|---------------------------------------------------------------|
| hMcl-1 <i>wt</i>         | 19572.16  | [M] = 19572<br>[M]+178 = 19750                                |
| hMcl-1 <i>wt</i> + hit 1 | 20001.66  | [M] = 20001<br>[M+H] <sup>+</sup> +178 = 20180                |
| hMcl-1 <i>wt</i> + hit 2 | 19888.5   | [M] = 19888<br>[M+H] <sup>+</sup> +178 = 20067                |
| hMcl-1 <i>wt</i> + 165D9 | 19922.2   | [M+H] <sup>+</sup> = 19923<br>[M+H] <sup>+</sup> +178 = 20101 |

| ID                   | Calcd [M] | Obs. (m/z)                                     |
|----------------------|-----------|------------------------------------------------|
| hMcl-1 H224A         | 19506.09  | [M] = 19506<br>[M]+178 = 19684                 |
| hMcl-1 H224A + hit 1 | 19935.59  | [M] = 19935                                    |
| hMcl-1 H224A + hit 2 | 19822.4   | [M] = 19822<br>[M+H] <sup>+</sup> +178 = 20001 |
| hMcl-1 H224A + 165D9 | 19856.11  | [M+H] <sup>+</sup> = 19857                     |

| ID                                                | Calcd [M] | Obs. (m/z)                                                    |
|---------------------------------------------------|-----------|---------------------------------------------------------------|
| <sup>15</sup> N hMcl-1 H252A (no His tag)         | 17981     | [M] = 17981<br>[M]+178 = 18159                                |
| <sup>15</sup> N hMcl-1 H252A (no His tag) + hit 1 | 18410.5   | [M+H] <sup>+</sup> = 18411<br>[M+H] <sup>+</sup> +178 = 18661 |
| <sup>15</sup> N hMcl-1 H252A (no His tag) + hit 2 | 18297.34  | [M+H] <sup>+</sup> = 18298<br>[M+H] <sup>+</sup> +178 = 20001 |
| <sup>15</sup> N hMcl-1 H252A (no His tag) + 165D9 | 18331.02  | [M+H] <sup>+</sup> = 18332                                    |

| ID                   | Calcd [M] | Obs. (m/z)                                                    |
|----------------------|-----------|---------------------------------------------------------------|
| hMcl-1 K234A         | 19515.06  | [M] = 19515<br>[M]+178 = 19693                                |
| hMcl-1 K234A + hit 1 | 19944.56  | [M] = 19944<br>[M+H] <sup>+</sup> +178 = 20123                |
| hMcl-1 K234A + hit 2 | 19831.4   | [M] = 19831<br>[M]+178 = 20009                                |
| hMcl-1 K234A + 165D9 | 19865.08  | [M+H] <sup>+</sup> = 19866<br>[M+H] <sup>+</sup> +178 = 20044 |

**Supplementary Table S2:** Data collection and refinement statistics for the complex between hMcl-1(172-323) and fragment hit 2.

|                              | <b>hMcl-1(172-323)/hit2</b>              |
|------------------------------|------------------------------------------|
| <b>Data collection</b>       |                                          |
| Beamline                     | DLS I-04                                 |
| Wavelength                   | 0.7460                                   |
| Resolution range (Å)         | 39.03 - 1.82 (1.885 - 1.82)              |
| Space group                  | P 1 21 1                                 |
| Unit cell                    | 41.556, 40.135, 42.052 (90, 111.868, 90) |
| $R_{\text{merge}}^a$         | 0.08596 (4.649)                          |
| Total reflections            | 11680 (834)                              |
| Mean I/sigma(I)              | 12.29 (0.30)                             |
| Completeness (%)             | 96.96 (73.39)                            |
| Wilson B-factor              | 28.06                                    |
| Multiplicity                 | 7.0 (7.3)                                |
| <b>Refinement</b>            |                                          |
| Resolution                   | 39.03 - 1.82 (1.885 - 1.82)              |
| $R_{\text{work}}$            | 0.2536 (0.4440)                          |
| $R_{\text{free}}$            | 0.2869 (0.4703)                          |
| Unique reflections           | 11327 (833)                              |
| Number of non-hydrogen atoms | 1227                                     |
| macromolecules               | 1196                                     |
| ligands                      | 22                                       |
| solvent                      | 9                                        |
| RMS bonds (Å)                | 0.009                                    |
| RMS angles (°)               | 1.25                                     |
| Ramachandran favored (%)     | 92.57                                    |
| Ramachandran allowed (%)     | 7.43                                     |
| Ramachandran outliers (%)    | 0.00                                     |
| Rotamer outliers (%)         | 0.78                                     |

|                  |       |
|------------------|-------|
| Clashscore       | 9.52  |
| Average B-factor | 49.39 |
| macromolecules   | 49.41 |
| ligands          | 46.97 |
| solvent          | 52.37 |

Statistics for the highest-resolution shell are shown in parentheses.
